# Supplementary material for: A pairwise cytokine code explains the organism-wide response to sepsis
Source: Springer Nature journal article supplement (doi:10.1038/s41590-023-01722-8), 2024-01-08
Supplement: MOESM2 [file 41590_2023_1722_MOESM2_ESM.pdf › 41590_2023_1722_MOESM2_ESM.pdf]

Reporting Summary

Nature Portfolio wishes to improve the reproducibility of the work that we publish. This form provides structure for consistency and transparency in reporting. For further information on Nature Portfolio policies, see our [Editorial Policies](#) and the [Editorial Policy Checklist](#).

Statistics

For all statistical analyses, confirm that the following items are present in the figure legend, table legend, main text, or Methods section.

|                                     |                                                                                                                                                                                                                                                                                                |
|-------------------------------------|------------------------------------------------------------------------------------------------------------------------------------------------------------------------------------------------------------------------------------------------------------------------------------------------|
| n/a                                 | Confirmed                                                                                                                                                                                                                                                                                      |
| <input type="checkbox"/>            | <input checked="" type="checkbox"/> The exact sample size ( <i>n</i> ) for each experimental group/condition, given as a discrete number and unit of measurement                                                                                                                               |
| <input type="checkbox"/>            | <input checked="" type="checkbox"/> A statement on whether measurements were taken from distinct samples or whether the same sample was measured repeatedly                                                                                                                                    |
| <input type="checkbox"/>            | <input checked="" type="checkbox"/> The statistical test(s) used AND whether they are one- or two-sided<br><i>Only common tests should be described solely by name; describe more complex techniques in the Methods section.</i>                                                               |
| <input type="checkbox"/>            | <input checked="" type="checkbox"/> A description of all covariates tested                                                                                                                                                                                                                     |
| <input type="checkbox"/>            | <input checked="" type="checkbox"/> A description of any assumptions or corrections, such as tests of normality and adjustment for multiple comparisons                                                                                                                                        |
| <input type="checkbox"/>            | <input checked="" type="checkbox"/> A full description of the statistical parameters including central tendency (e.g. means) or other basic estimates (e.g. regression coefficient) AND variation (e.g. standard deviation) or associated estimates of uncertainty (e.g. confidence intervals) |
| <input type="checkbox"/>            | <input checked="" type="checkbox"/> For null hypothesis testing, the test statistic (e.g. <i>F</i> , <i>t</i> , <i>r</i> ) with confidence intervals, effect sizes, degrees of freedom and <i>P</i> value noted<br><i>Give P values as exact values whenever suitable.</i>                     |
| <input checked="" type="checkbox"/> | <input type="checkbox"/> For Bayesian analysis, information on the choice of priors and Markov chain Monte Carlo settings                                                                                                                                                                      |
| <input type="checkbox"/>            | <input checked="" type="checkbox"/> For hierarchical and complex designs, identification of the appropriate level for tests and full reporting of outcomes                                                                                                                                     |
| <input checked="" type="checkbox"/> | <input type="checkbox"/> Estimates of effect sizes (e.g. Cohen's <i>d</i> , Pearson's <i>r</i> ), indicating how they were calculated                                                                                                                                                          |

Our web collection on [statistics for biologists](#) contains articles on many of the points above.

Software and code

Policy information about [availability of computer code](#)

|                 |                                                                                                                                                                                                                                                                                                                                                                                                                                                                                                                                                                                                                                                                                                                                                                                                                                                                                                                                                                                                                                                                                                                                                                                                                                        |
|-----------------|----------------------------------------------------------------------------------------------------------------------------------------------------------------------------------------------------------------------------------------------------------------------------------------------------------------------------------------------------------------------------------------------------------------------------------------------------------------------------------------------------------------------------------------------------------------------------------------------------------------------------------------------------------------------------------------------------------------------------------------------------------------------------------------------------------------------------------------------------------------------------------------------------------------------------------------------------------------------------------------------------------------------------------------------------------------------------------------------------------------------------------------------------------------------------------------------------------------------------------------|
| Data collection | Flow cytometry data and LEGENDplex data were collected with NovoExpress (version 1.3.0) and LEGENDplex software v8. Bulk and spatial RNA-seq data collection and immunohistochemistry image acquisition are detailed in the methods section of the paper.                                                                                                                                                                                                                                                                                                                                                                                                                                                                                                                                                                                                                                                                                                                                                                                                                                                                                                                                                                              |
| Data analysis   | The following software packages were used for data analysis: Flow cytometry data were analyzed with FlowJo (Version 10.6.2) software. Raw sequencing data were processed using bcbio-nextgen project (version 1.1.5) or STARsolo (version 2.7.10a). Integrated data analysis was performed in R (version 4.2.0 and 3.5.1) or Python (version 3.8.5), based on the packages tidyverse (version 2.0.0), fastTopics (version 0.6-142), data.table (version 1.14.8), cmapR (version 1.8.0), ComplexHeatmap (version 2.12.1), circlize (version 0.4.15), RColorBrewer (version 1.1-3), enrichR (version 3.1), ggrepel (version 0.9.3), patchwork (version 1.1.2), edgeR (version 3.24.3), limma (version 3.38.3), cowplot (version 1.1.0), glue (version 1.4.2), fs (version 1.3.2), Matrix (version 1.2-18), Scanpy (version 1.9.1), scikit-image (version 1.1.3), scikit-learn (version 0.24.2), CARD (version 1.0.0), seaborn (version 0.11.2). ImageJ (version 2.8.0) was used for image analysis. The Space Ranger software was used to process, align, and summarize the FASTQ files. Adobe Illustrator (version 26.2.1) was used for data visualization and figure preparation. Source code is available at 10.5281/zenodo.10158368. |

For manuscripts utilizing custom algorithms or software that are central to the research but not yet described in published literature, software must be made available to editors and reviewers. We strongly encourage code deposition in a community repository (e.g. GitHub). See the Nature Portfolio [guidelines for submitting code & software](#) for further information.

## Data

Policy information about [availability of data](#)

All manuscripts must include a [data availability statement](#). This statement should provide the following information, where applicable:

- Accession codes, unique identifiers, or web links for publicly available datasets
- A description of any restrictions on data availability
- For clinical datasets or third party data, please ensure that the statement adheres to our [policy](#)

Raw and processed sequencing data are available from the NCBI Gene Expression Omnibus (GEO) repository (accession number: GSE224146).  
Source code and preprocessed datasets are available at 10.5281/zenodo.10158368.  
We used GRCm39 (GCF\_000001635.27) as mouse reference genome.

## Research involving human participants, their data, or biological material

Policy information about studies with [human participants or human data](#). See also policy information about [sex, gender \(identity/presentation\), and sexual orientation](#) and [race, ethnicity and racism](#).

|                                                                    |     |
|--------------------------------------------------------------------|-----|
| Reporting on sex and gender                                        | N/A |
| Reporting on race, ethnicity, or other socially relevant groupings | N/A |
| Population characteristics                                         | N/A |
| Recruitment                                                        | N/A |
| Ethics oversight                                                   | N/A |

Note that full information on the approval of the study protocol must also be provided in the manuscript.

## Field-specific reporting

Please select the one below that is the best fit for your research. If you are not sure, read the appropriate sections before making your selection.

☒ Life sciences ☐ Behavioural & social sciences ☐ Ecological, evolutionary & environmental sciences

For a reference copy of the document with all sections, see [nature.com/documents/nr-reporting-summary-flat.pdf](https://www.nature.com/documents/nr-reporting-summary-flat.pdf)

## Life sciences study design

All studies must disclose on these points even when the disclosure is negative.

|                 |                                                                                                                                                                                                                                                                                       |
|-----------------|---------------------------------------------------------------------------------------------------------------------------------------------------------------------------------------------------------------------------------------------------------------------------------------|
| Sample size     | No statistical methods were used to predetermine sample sizes, but our sample sizes are similar to those reported in previous publications                                                                                                                                            |
| Data exclusions | No samples were excluded, unless data acquisition quality was insufficient (e.g., low quality of RNA, or low raw read counts for RNA-seq).                                                                                                                                            |
| Replication     | Biological replicate samples were detailed in the accompanying figure legends or methods. The results were consistent in all independent experiments.                                                                                                                                 |
| Randomization   | No randomization was done as it is not relevant for allocation of mice. Mice were selected according to their genotype, age and sex matched. Mice were randomly assigned for experiments reported. Processing of samples from the various organs did not follow any particular order. |
| Blinding        | Data collection and analysis were not performed blind to the conditions of the experiments.                                                                                                                                                                                           |

## Reporting for specific materials, systems and methods

We require information from authors about some types of materials, experimental systems and methods used in many studies. Here, indicate whether each material, system or method listed is relevant to your study. If you are not sure if a list item applies to your research, read the appropriate section before selecting a response.

## Materials &amp; experimental systems

## Methods

|                                     |                                                                 |
|-------------------------------------|-----------------------------------------------------------------|
| n/a                                 | Involved in the study                                           |
| <input type="checkbox"/>            | <input checked="" type="checkbox"/> Antibodies                  |
| <input checked="" type="checkbox"/> | <input type="checkbox"/> Eukaryotic cell lines                  |
| <input checked="" type="checkbox"/> | <input type="checkbox"/> Palaeontology and archaeology          |
| <input type="checkbox"/>            | <input checked="" type="checkbox"/> Animals and other organisms |
| <input checked="" type="checkbox"/> | <input type="checkbox"/> Clinical data                          |
| <input checked="" type="checkbox"/> | <input type="checkbox"/> Dual use research of concern           |
| <input checked="" type="checkbox"/> | <input type="checkbox"/> Plants                                 |

|                                     |                                                    |
|-------------------------------------|----------------------------------------------------|
| n/a                                 | Involved in the study                              |
| <input checked="" type="checkbox"/> | <input type="checkbox"/> ChIP-seq                  |
| <input type="checkbox"/>            | <input checked="" type="checkbox"/> Flow cytometry |
| <input checked="" type="checkbox"/> | <input type="checkbox"/> MRI-based neuroimaging    |

## Antibodies

## Antibodies used

CD16/CD32 blocking antibody (clone 93, BioLegend Cat# 101, 1 µL/sample)  
<https://www.biolegend.com/ja-jp/products/purified-anti-mouse-cd16-32-antibody-190>  
 CD19-FITC (clone 1D3/CD19, BioLegend Cat# 152403, 2 µL/sample)  
<https://www.biolegend.com/ja-jp/products/fitc-anti-mouse-cd19-antibody-13615>  
 B220-PerCP (clone RA3-6B2, BioLegend Cat# 103233, 4 µL/sample)  
<https://www.biolegend.com/ja-jp/products/percp-anti-mouse-human-cd45r-b220-antibody-4266>  
 CD93-PE (clone AA4.1, BioLegend Cat# 136503, 4 µL/sample)  
<https://www.biolegend.com/ja-jp/products/pe-anti-mouse-cd93-aa4-1-early-b-lineage-antibody-6314>  
 CD23-APC (clone B3B4, BioLegend Cat# 101619, 1 µL/sample)  
<https://www.biolegend.com/ja-jp/products/apc-anti-mouse-cd23-antibody-9762>  
 CD21-Pacific Blue (clone 7E9, BioLegend Cat# 123413, 1 µL/sample)  
<https://www.biolegend.com/ja-jp/products/pacific-blue-anti-mouse-cd21-cd35-cr2-cr1-antibody-4336>  
 Ter119-FITC (clone TER-119, BioLegend Cat# 116205, 4 µL/sample)  
<https://www.biolegend.com/ja-jp/products/fitc-anti-mouse-ter-119-erythroid-cells-antibody-1865>  
 CD45-APC-Cy7 (clone 30-F11, BioLegend Cat#103115, 2 µL/sample)  
<https://www.biolegend.com/ja-jp/products/apc-cyanine7-anti-mouse-cd45-antibody-2530>  
 Zombie Yellow Fixable Viability kit (BioLegend Cat# 423103, 0.5 µL/sample)  
<https://www.biolegend.com/ja-jp/products/zombie-yellow-fixable-viability-kit-8514>  
 DAPI (Biotium Cat#40043, 1 µL/sample)  
<https://biotium.com/product/dapi/>  
 anti-TNF (clone XT3.11, BioXCell Cat#BE0058, 50 µg/mouse)  
[https://bioxccl.com/invivomab-anti-mouse-tnfa?gad\\_source=1&gclid=EAlaIqobChMIh\\_HKo8vUggMVQhJ7Bx3SOwbIEAAYASAAEgKCYfD\\_BwE](https://bioxccl.com/invivomab-anti-mouse-tnfa?gad_source=1&gclid=EAlaIqobChMIh_HKo8vUggMVQhJ7Bx3SOwbIEAAYASAAEgKCYfD_BwE)  
 anti-IL-18 (clone YIGIF74-1G7, BioXCell Cat#BE0237, 50 µg/mouse)  
<https://bioxccl.com/invivomab-anti-mouse-il-18-be0237>  
 anti-IFN-γ (clone XMG1.2, BioXCell Cat#BE0055, 50 µg/mouse)  
<https://bioxccl.com/invivomab-anti-mouse-ifng-be0055>  
 anti-IL-1β (clone B122, BioXCell Cat#BE0246, 50 µg/mouse)  
<https://bioxccl.com/invivomab-anti-mouse-rat-il-1b>  
 anti-Ly-6G (clone 1A8, BioLegend Cat#127602, 1:100)  
<https://www.biolegend.com/ja-jp/products/purified-anti-mouse-ly-6g-antibody-4767?GroupID=BLG7232>  
 anti-F4/80 (clone BM8, BioLegend Cat#123102, 1:100)  
<https://www.biolegend.com/ja-jp/products/purified-anti-mouse-f4-80-antibody-4064>

## Validation

All antibodies are commercially available and have been validated by manufacturers and in previous publications. The manufacturers' websites provide details regarding validations and associated reference publication (see above section). For flow cytometry, antibodies were titrated in the laboratory before use.

## Animals and other research organisms

Policy information about [studies involving animals](#); [ARRIVE guidelines](#) recommended for reporting animal research, and [Sex and Gender in Research](#)

## Laboratory animals

C57BL/6J mice (wild-type, stock 000664), B6.129S7-Ifngtm1Ts/J (Ifng KO, stock 002287), B6.129P2-Il18tm1Aki/J (Il18 KO, stock 004130), C57BL/6J-Il1bem2Lutzj/Mmjax (Il1b KO, stock 068082-JAX), and B6.129S-Tnftm1Gkl/J (Tnf KO, stock 005540) were obtained from the Jackson Laboratories. For all experiments, mice were used at 5-8 weeks of age. Animals were housed in specific pathogen-free and BSL2 conditions at The University of Chicago. Mice were on 12hr light/dark cycles with daylight in Chicago, IL, USA. University of Chicago's Animal facility was maintained at 25 degree c and 30-70% humidity.

## Wild animals

The study did not involve wild animals.

## Reporting on sex

Only female mice were used for experiments.

## Field-collected samples

The study did not involve samples collected from the field.

## Ethics oversight

All experiments were performed in accordance with the US National Institutes of Health Guide for the Care and Use of Laboratory Animals and approved by The University of Chicago Institutional Animal Care and Use Committee.

Note that full information on the approval of the study protocol must also be provided in the manuscript.

## Flow Cytometry

### Plots

Confirm that:

- ☒ The axis labels state the marker and fluorochrome used (e.g. CD4-FITC).
- ☒ The axis scales are clearly visible. Include numbers along axes only for bottom left plot of group (a 'group' is an analysis of identical markers).
- ☒ All plots are contour plots with outliers or pseudocolor plots.
- ☒ A numerical value for number of cells or percentage (with statistics) is provided.

### Methodology

#### Sample preparation

To analyze splenic B cells, total splenocytes were obtained by mashing spleens on 70-µm filters followed by red blood cell lysis (Lonza). To analysis red blood cell content in the bone marrow, total bone marrow cells were flushed out of femora and tibiae using PBS. Single-cell suspensions were stained in the presence of Fc receptor-blocking antibodies (anti-mouse CD16/32, clone 93) using the following antibodies (BioLegend): CD19-FITC (clone 1D3/CD19, 152403), B220-PerCP (clone RA3-6B2, 103233), CD93-PE (clone AA4.1, 136503), CD23-APC (clone B3B4, 101619), CD21-Pacific Blue (clone 7E9, 123413), Ter119-FITC (clone TER-119, 116205), CD45-APC-Cy7 (clone 30-F11, 103115). Cell viability was measured using Zombie Yellow Fixable Viability kit (423103) or DAPI.

#### Instrument

Flow Cytometry analysis was performed on a NovoCyte flow cytometer (Acea Biosciences/Agilent)

#### Software

Flow cytometry data were analyzed with FlowJo (Version 10.6.2) software.

#### Cell population abundance

Purity was assessed by Flow cytometry analysis. Absolute numbers of cells are outlined in relevant Figures.

#### Gating strategy

Events were initially gated by FSC-A and SSC-A and then FSC-A and FSC-H were used to exclude doublets. Live cells were gated using a viability dye. Subsequent gating depends on the population of interest and is outlined in Supplementary Information.

- ☒ Tick this box to confirm that a figure exemplifying the gating strategy is provided in the Supplementary Information.
